# Supplementary material for: Metabolic Landscape of the Mouse Liver by Quantitative 31P Nuclear Magnetic Resonance Analysis of the Phosphorome
Source: PubMed Central journal article supplement — Hepatology. 2021 Jun 15;74(1):148–63. doi: 10.1002/hep.31676 (PMC8362057; doi:10.1002/hep.31676), 2021-06-15
Supplement: HEP-74-148-s001.pdf [file HEP-74-148-s001.pdf]

## SUPPLEMENTARY MATERIAL

# Metabolic landscape of the mouse liver by <sup>31</sup>P-NMR quantitative analysis of the phosphorome

Ganeko Bernardo-Seisdedos<sup>1,2,3</sup>, Jon Bilbao<sup>1,2</sup>, David Fernández-Ramos<sup>2,4</sup>, Fernando Lopitz-Otsoa<sup>2</sup>, Virginia Gutierrez de Juan<sup>2</sup>, Maider Bizkarguenaga<sup>2</sup>, Borja Mateos<sup>5</sup>, Tammo Diercks<sup>6</sup>, Shelly, Lu<sup>7</sup>, José M Mato<sup>2,4</sup> and Oscar Millet<sup>2,3</sup>

<sup>1</sup>Both authors contributed equally.

<sup>2</sup>Precision Medicine and Metabolism Laboratory, CIC bioGUNE, Basque Research and Technology Alliance, Parque Tecnológico de Vizcaya, Ed. 800. 48160, Derio, Spain.

<sup>3</sup>ATLAS Molecular Pharma S. L., Parque Tecnológico de Vizcaya, Ed. 800. 48160, Derio, Spain.

<sup>4</sup>CIBERehd, Instituto de Salud Carlos III, Madrid, Spain

<sup>5</sup>Department of Structural and Computational Biology, University of Vienna, Max Perutz Labs, Vienna Biocenter Campus 5. 1030 Vienna, Austria.

<sup>6</sup>NMR Platform, CIC bioGUNE, Basque Research and Technology Alliance, Parque Tecnológico de Vizcaya, Ed. 800. 48160 Derio, Spain

<sup>7</sup>Division of Digestive and Liver diseases, Department of Medicine, Cedars-Sinai Medical Center, Los Angeles, CA 90048, US.

# PROTOCOL FOR METABOLITE EXTRACTION AND NMR PEAK DECONVOLUTION, ASSIGNMENT AND QUANTIFICATION

## 1. Extraction of metabolites from liver tissue samples

For each set of experiments 3 different mice were used to ensure robustness and statistical significance. We used the following weighted livers.

| Target              | Porphyria            |              |                  | NASH                      |                   |                       |               |
|---------------------|----------------------|--------------|------------------|---------------------------|-------------------|-----------------------|---------------|
| Mice models         | Control CEP (6 mice) | CEP (7 mice) | CEP+CPX (7 mice) | Control MAT1A-KO (6 mice) | MAT1A-KO (9 mice) | Control CDHF (6 mice) | CDHF (9 mice) |
| Weighted liver (mg) | 302                  | 308          | 301              | 303                       | 362               | 309                   | 107           |
|                     | 329                  | 312          | 279              | 340                       | 319               | 304                   | 103           |
|                     | 308                  | 283          | 294              | 322                       | 319               | 317                   | 111           |
|                     | 315.5                | 196          | 299              | 309.5                     | 311               | 307                   | 129           |
|                     | 318                  | 292          | 313              | 302                       | 331.6             | 318                   | 99            |
|                     | 317                  | 251          | 298              | 317                       | 313               | 301                   | 104           |
|                     |                      | 301          | 321              |                           | 306               |                       | 98            |
|                     |                      |              |                  |                           | 314.4             |                       | 100           |
|                     |                      |              |                  | 303                       |                   | 101                   |               |

**Table S1.** Liver weights used for the extraction for the different animals employed.

The metabolic extraction procedure was done according to the protocol described in Figure S1:

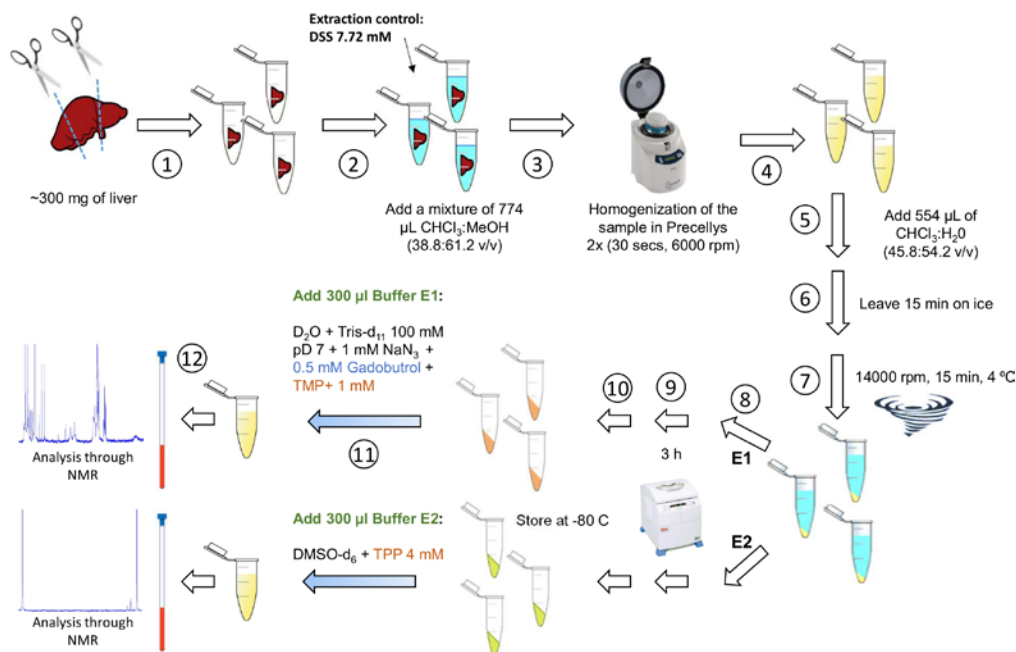

**Figure S1. Extraction procedure.** The protocol details how the metabolic extraction was performed for each liver.

- 1) An aliquot of about ~300 mg of mouse liver was weighted.

- 2) This amount of liver tissue was divided in 100 mg pieces and placed into 3 different Eppendorfs.
- 3) The extraction was carried out considering previously reported ternary mixtures of  $\text{CHCl}_3:\text{MeOH}:\text{H}_2\text{O}$  (Treatment 1<sup>1</sup> and Treatment 2<sup>2</sup>, Figure S2). During liver extraction it is assumed that 90% of liver's weight will contribute to the water phase (indicated as a shift to darker spheres). Thus, 55:25:20 w/w/w  $\text{CHCl}_3:\text{MeOH}:\text{H}_2\text{O}$  mixture ensures a equilibrated extraction with a marked biphasic extraction of  $\text{CHCl}_3:\text{MeOH}:\text{H}_2\text{O}$  (indicated as a solid red line). Dashed green line indicates the maximum estimated chloroform "tie-line". Thus, for every 100 mgs of liver 774  $\mu\text{L}$  of  $\text{CHCl}_3:\text{MeOH}$  (38.8:61.2 v/v\*\*) was added. During this step 7.72 mM of DSS was added for the determination of yield extraction.

\*\* For the sake of clarity we transform weights to volumes.

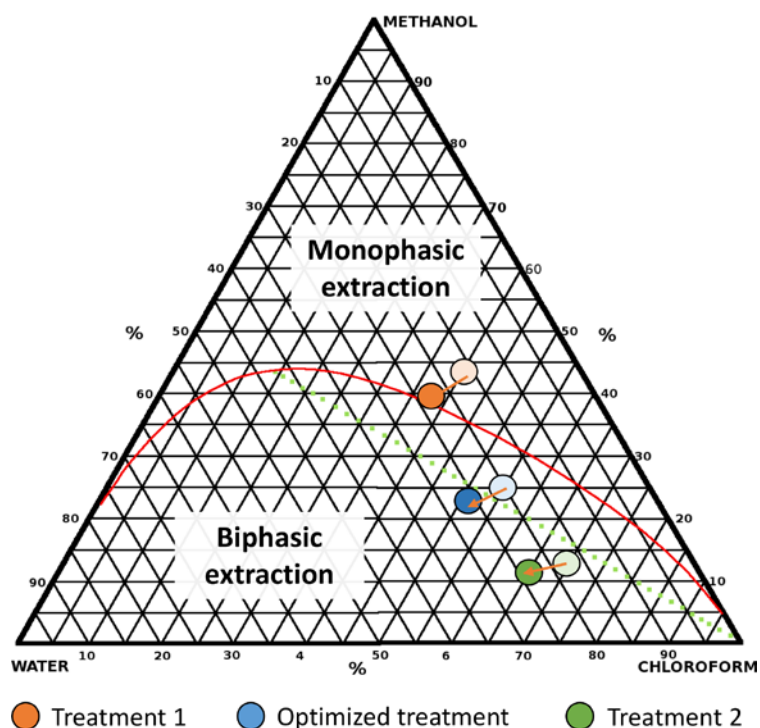

**Figure S2. Ternary phase diagram of  $\text{CHCl}_3:\text{MeOH}:\text{H}_2\text{O}$ .** *Treatment 1* (orange sphere) corresponds to an extraction at 40:44:16<sup>1</sup>, *Treatment 2* (green sphere) corresponds to mixture of 70:13:17<sup>2</sup>, and *Optimized treatment* corresponds to a proportion of 55:25:20 w/w/w of  $\text{CHCl}_3:\text{MeOH}:\text{H}_2\text{O}$ . Dashed green line indicates the maximum estimated chloroform "tie-line". Red line indicated the biphasic separation region. During liver extraction it is considered that a 90% of liver's weight will contribute to the water phase (indicated as a shift to darker spheres).

- 4) Tissue was homogenized using two cycles of Precellys for 30 minutes at 6000 rpms.
- 5) Afterwards 554  $\mu\text{L}$  of  $\text{CHCl}_3:\text{H}_2\text{O}$  (45.8:54.2 v/v) were added to each Eppendorf.
- 6) Samples were vortexed and leaved for 15 minutes on ice.
- 7) Tubes were centrifuged at 14000 rpms for 15 minutes at 4 °C.
- 8) Phases were carefully divided into different Eppendorfs as hydrophilic (E1) and hydrophobic (E2) material.

- 9) Samples were dried using Speedvac for at least 3 h.
- 10) The remaining powder was stored at -80 °C until further use.
- 11) For NMR measurements of the **E1** extraction of the liver (hydrophilic phase) the extracted material from the three dried Eppendorfs was combined and resuspended using 300  $\mu$ L of E1 buffer (100 mM Tris-d11 at pD 7 + 1 mM NaN<sub>3</sub> + 0.5 mM Gadobutrol + 1 mM TMP (internal reference) in D<sub>2</sub>O). **E2** extraction is resuspended in 300  $\mu$ L of buffer E2 (DMSO-d<sub>6</sub> + TPP 4 mM) following the same procedure.
- 12) The resuspended extracts (300  $\mu$ L) were filled into 5 mm Shigemi NMR tubes and NMR experiments were recorded.

## 2. NMR data acquisition and spectra processing

All NMR experiments were recorded at 298 K on a Bruker 600 MHz (12 T) Avance III spectrometer equipped with a QXI (<sup>1</sup>H,<sup>13</sup>C,<sup>15</sup>N,<sup>31</sup>P) probehead. For each sample three different experiments were collected (Figure S3 and S4):

- (i) 1D <sup>31</sup>P-NMR *zgif* spectrum with inverse gated <sup>1</sup>H decoupling (11.5 h).
- (ii) 1D <sup>1</sup>H-NMR *p3919gp* with water signals suppression using a binomial 3-9-19 pulse with echo gradient pair (7 min).
- (iii) 2D <sup>1</sup>H-<sup>31</sup>P-COLOC spectrum with coherence selection by gradients (13.5 h).

The 1D <sup>31</sup>P experiment was recorded with long interscan delays  $d1 > 3 \cdot T_{1,max}(\text{<sup>31</sup>P})$  for quantification, where the paramagnetic relaxation enhancer (0.5 mM of Gadobutrol) added only to the hydrophilic E1 fraction allowed to use a short  $d1 = 1$  s while the hydrophobic E2 fraction required  $d1 = 5$  s.

Altogether, considering all the experimental set-up we obtained a detection limit of ~200 pmol of <sup>31</sup>P-compound per mg of liver with a signal-to-noise ratio of 4. At this configuration we concluded that a minimum of 100 mg and an optimal value of 300 mg of liver tissue are required for a reliable metabolite quantification by this method. Yet, we reckon that an optimized NMR hardware set (i. e. direct observation for heteronuclei) would result in a 5-fold increase in sensitivity, equivalent to a demand of only 20 mg of liver tissue.

## 3. NMR Peak assignment

The same set of spectra were recorded for some 100 pure phosphorylated standard compounds (listed in Table S1) to facilitate the identification of phosphorylated liver metabolites. Each of <sup>31</sup>P standards was prepared at increased 5 mM concentration, in the appropriate solution corresponding to either E1 or E2 extract (see above), to allow faster NMR data acquisition.

The phosphorylated liver metabolites were identified by comparison with the <sup>31</sup>P chemical shifts of the pure standard compounds compiled in supplementary Table S1. In some cases, spiking experiments with selected pure standard compounds were performed to confirm the metabolite assignment. In figure S3 we show the use of the <sup>1</sup>H-<sup>31</sup>P-COLOC experiment in the assignment of phosphorylated metabolites. In a complex mixture of phosphorylated compounds from a CEP

UROIIIS<sup>P248Q/P248Q</sup> mouse liver extraction we overlay 3 different <sup>1</sup>H-<sup>31</sup>P-COLOCs from S7P, PEA and UDPG standards. The peaks overlap and automatically identify the compounds in the hydrophilic extract.

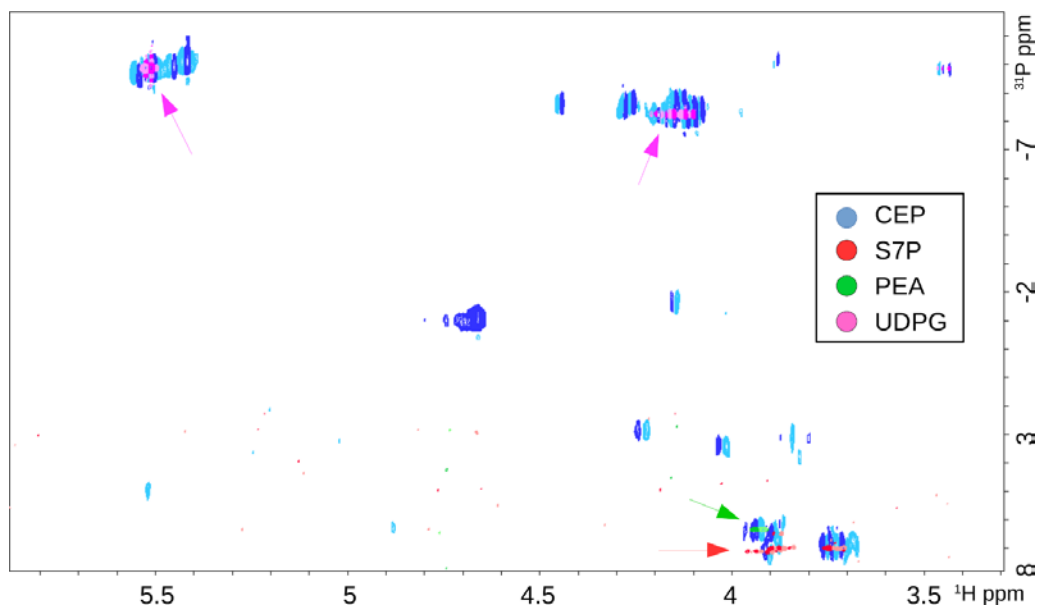

**Figure S3. <sup>1</sup>H-<sup>31</sup>P-COLOC spectrum CEP UROIIIS<sup>P248Q/P248Q</sup> hydrophilic extraction.** Correlation spectroscopy via Long-range Coupling (<sup>1</sup>H-<sup>31</sup>P-COLOC) is a 2D heteronuclear experiment that correlates <sup>31</sup>P and <sup>1</sup>H nuclei. The addition of a second dimension facilitates the assignment of overlapping signals. In blue <sup>1</sup>H-<sup>31</sup>P-COLOC spectrum CEP mouse liver E1 extraction. S7P (red), PEA (green) and UDPG (pink) <sup>1</sup>H-<sup>31</sup>P-COLOC spectra are overlaid as an example of chemical shift assignment.

#### 4. NMR Peak integration, deconvolution and quantification

All NMR data processing and analysis was done using TopSpin 4.0.7 (Bruker Biospin GmbH) and in-house MatLab scripts. Assigned <sup>31</sup>P-metabolites were then quantified by referencing their <sup>31</sup>P peak integral against the added internal reference compound as shown in figure S4. In case of signal overlap, we applied peak deconvolution (command LDCON) to assign corresponding peak areas and thus determine the final concentration. For example, in the lipophilic phase of a Chow mouse liver PE and CL are overlapping. After peak deconvolution we can determine the area for each compound within the overlapping signal, finally determining the concentration of each. In the phosphorous spectra we can easily find our internal reference on the left which will be integrated and calibrated to a determined concentration value (1 mM for TMP<sup>+</sup> and 4 mM for TPP). Considering this, metabolic quantification is done by peak integration and comparison with the reference taking into the account the spin system of the peak.

For the <sup>1</sup>H-spectra we identify, integrate and calibrate the reference's peak and we perform the same operation as for phosphorous metabolites but in this case for the lactate and choline quantification in the hydrophilic phase and for triglycerides and total cholesterol determination in the lipophilic phase.

The extraction yield was calculated through the comparison of the remaining peak observed at 0 ppm that corresponds to the extraction reference (DSS) that integrates 9 H and the absolute integral of the peak that integrates 12 H of the reference compound of the E1 (TMP<sup>+</sup>).

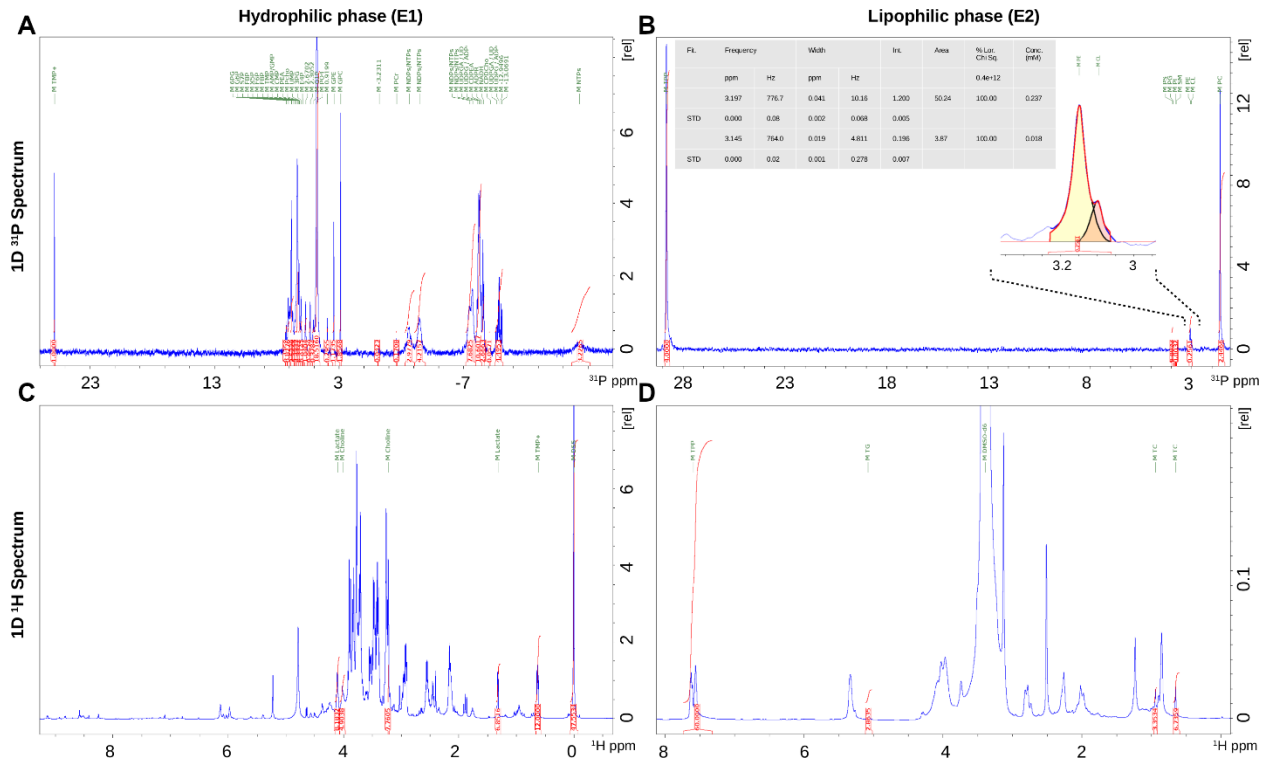

**Figure S4. Peak quantification.** <sup>31</sup>P-NMR *zgi* spectra (first row) and <sup>1</sup>H-NMR *p3919gp* spectra (second row) of the hydrophilic (first column) and the lipophilic (second column) of a WT mouse liver extraction. Peak assignment, deconvolution and quantification is performed as mentioned above.

## References

1. Bligh, E.G. and Dyer, W. J. Canadian Journal of Biochemistry and Physiology. *Can. J. Biochem. Physiol.* **37**, (1959).
2. Nagana Gowda, G. A. & Raftery, D. Analysis of Coenzymes and Antioxidants in Tissue and Blood Using 1D 1H NMR Spectroscopy. in *Methods in Molecular Biology* vol. 2037 97–110 (Humana Press Inc., 2019).

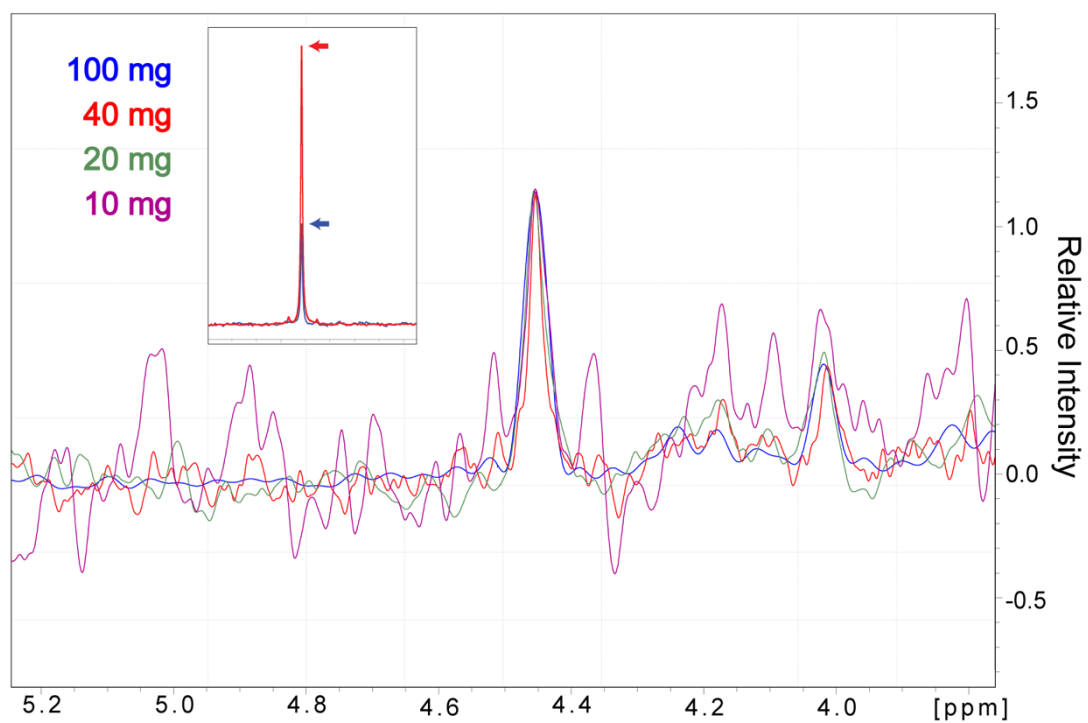

**Figure S5. Signal-to-noise ratio (S/N) as a function of the amount of tissue initially used.** The spectrum can be quantified using 20 mg of tissue or more. Inset: comparison of the same signal with two different NMR probes.

| Compound                                                              | Company | Reference |
|-----------------------------------------------------------------------|---------|-----------|
| 1-(9Z-octadecenoyl)-sn-glycero-3-phospho-L-serine                     | Avanti  | 858143P   |
| 1,2-diheptadecanoyl-sn-glycero-3-phosphate (sodium salt)              | Avanti  | 830856P   |
| 1,2-dimirystoyl-sn-glycero-3-phospho-1'-rac-glycerol                  | Avanti  | 840445    |
| 1,2-dimirystoyl-sn-glycero-3-phosphocholine                           | Avanti  | 850345    |
| 1-hexanoyl-2-hydroxy-sn-glycero-3-phosphate (ammonium salt)           | Avanti  | 857119C   |
| 1-oleyl-2-hydroxy-sn-glycero-3-phosphocholine                         | Avanti  | 845875    |
| 1-oleyl-2-hydroxy-sn-glycero-3-phosphoethanolamine                    | Avanti  | 846725    |
| 1-palmitoyl-2-hydroxy-sn-glycero-3-phosphoethanolamine                | Avanti  | 856705P   |
| 1-palmitoyl-2-oleyl-sn-glycero-3-phosphocholine                       | Avanti  | 850457    |
| 1-palmitoyl-2-oleyl-sn-glycero-3-phosphoethanolamine                  | Avanti  | 850757    |
| 2,3-Diphospho-D-glyceric acid pentasodium salt                        | Sigma   | D5764     |
| 3-Deoxy-2-keto-6-phosphogluconic acid lithium salt                    | Sigma   | 79156     |
| 6-Phosphogluconic acid trisodium salt                                 | Sigma   | P7877     |
| Adenosine 3',5'-cyclic monophosphate sodium salt                      | Sigma   | A6885     |
| Adenosine 5'-diphosphate sodium salt                                  | Sigma   | A2754     |
| Adenosine 5'-diphosphoglucose disodium salt                           | Sigma   | A0627     |
| Adenosine 5'-diphosphoribose sodium salt                              | Sigma   | A0752     |
| Adenosine 5'-monophosphate sodium salt                                | Sigma   | A1752     |
| Adenosine 5'-triphosphate disodium salt                               | Sigma   | A2383     |
| Cardiolipine (Heart,Bovine) (sodium salt)                             | Avanti  | 840012    |
| CDP-ethanolamine sodium salt hydrate                                  | Sigma   | 90756     |
| Cytidine 5'-diphosphate sodium salt                                   | Sigma   | C9755     |
| Cytidine 5'-diphosphocholine sodium salt                              | Sigma   | C0256     |
| Cytidine 5'-monophosphate disodium salt                               | Sigma   | C1006     |
| Cytidine 5'-triphosphate disodium salt                                | Sigma   | C1506     |
| D-(-)-3-phosphoglyceric acid disodium salt                            | Sigma   | 79473     |
| D-(+)-2-phosphoglyceric acid disodium salt                            | Sigma   | 79470     |
| D-Erythrose 4-phosphate sodium salt                                   | Sigma   | E0377     |
| D-Fructose 1,6-bisphosphate trisodium salt                            | Sigma   | F6803     |
| D-Fructose 6-phosphate disodium salt                                  | Sigma   | F3627     |
| D-Glucose 6-phosphate disodium salt                                   | Sigma   | G7879     |
| Dihydroxiacetone phosphate lithium salt / Glycerlaldehyde 3-phosphate | Sigma   | 37442     |
| D-Ribose 5-phosphate disodium salt                                    | Sigma   | R7750     |
| D-Ribulose 5'-phosphate disodium salt                                 | Sigma   | 83899     |
| D-Sedoheptulose 7-phosphate lithium salt                              | Sigma   | 78832     |
| D-Xylulose 5'-phosphate lithium salt                                  | Sigma   | 15732     |
| Farnesyl pyrophosphate                                                | Sigma   | F6892     |
| Flavin adenine dinucleotide disodium salt                             | Sigma   | F6625     |
| Geranyl pyrophosphate                                                 | Sigma   | G6772     |
| Guanosine 5'-diphosphate sodium salt                                  | Sigma   | G7127     |
| Guanosine 5'-diphosphoglucose sodium salt                             | Sigma   | G7502     |
| Guanosine 5'-monophosphate disodium salt                              | Sigma   | G8377     |
| Guanosine 5'-triphosphate sodium salt                                 | Sigma   | G8877     |
| Lithium 6-phospho-D-galactonate                                       | Sigma   | 55962     |
| Lithium carbamoylphosphate dibasic hydrate                            | Sigma   | C5625     |
| Lithium potassium acetyl phosphate                                    | Sigma   | A0262     |
| L- $\alpha$ -Glycerophosphocholine                                    | Sigma   | G5291     |
| L- $\alpha$ -Phosphatidylcholine                                      | Avanti  | 840054    |
| L- $\alpha$ -Phosphatidylglycerol (Egg,Chicken) (sodium salt)         | Avanti  | 841138    |



|                                                                           |        |        |
|---------------------------------------------------------------------------|--------|--------|
| L- $\alpha$ -Phosphatidylinositol(Liver,Bovine) (sodium salt)             | Avanti | 840042 |
| L- $\alpha$ -Phosphatidylserine(Brain,Porcine) (sodium salt)              | Avanti | 840032 |
| O-Phosphorylethanolamine                                                  | Sigma  | P0503  |
| Phospho(enol)pyruvic acid monopotassium salt                              | Sigma  | 860077 |
| Phosphocholine chloride calcium salt tetrahydrate                         | Sigma  | P0378  |
| Phosphocreatine disodium salt hydrate                                     | Sigma  | P6502  |
| Riboflavin 5'-monophosphate sodium salt                                   | Sigma  | F2253  |
| sn-Glycerol 1-phosphate lithium salt                                      | Sigma  | 92034  |
| sn-Glycerol 3-phosphate bis(cyclohexylammonium) salt                      | Sigma  | G4631  |
| Sodium phosphate                                                          | Sigma  | 342483 |
| Sodium pyrophosphate tetrabasic                                           | Sigma  | 322466 |
| Spingomyelin (Egg,Chicken)                                                | Avanti | 860061 |
| Tetramethylphosphonium chloride                                           | Sigma  | 288276 |
| Thymidine 5'-diphosphate disodium salt                                    | Sigma  | T7004  |
| Thymidine 5'-monophosphate disodium salt                                  | Sigma  | T7004  |
| Thymidine 5'-triphosphate sodium salt                                     | Sigma  | T0251  |
| Triphenylphosphine oxide                                                  | Sigma  | T84603 |
| Uridine 5'-diphosphate disodium salt                                      | Sigma  | 94330  |
| Uridine 5'-diphosphogalactose disodium salt                               | Sigma  | U4500  |
| Uridine 5'-diphosphoglucose disodium salt                                 | Sigma  | 94335  |
| Uridine 5'-diphosphoglucuronic acid trisodium salt                        | Sigma  | U6751  |
| Uridine 5'-monophosphate disodium salt                                    | Sigma  | U6375  |
| Uridine 5'-triphosphate trisodium salt hydrate                            | Sigma  | 94370  |
| $\alpha$ -D-Glucose 1-phosphate disodium salt                             | Sigma  | G7000  |
| 6- Nicotinamide adenine dinucleotide                                      | Sigma  | N0632  |
| 6-Glycerophosphate disodium salt                                          | Sigma  | G9422  |
| 6-Nicotinamide adenine dinucleotide 2'-phosphate reduced tetrasodium salt | Sigma  | N7505  |

**Table S2. Phosphorilated metabolites tested.**

| Peak | Compound        | Extract | Congenital Erythropoietic Porphyria [nmol/mg] |      |       |      |            |      | NASH [nmol/mg]   |      |          |      |              |      |       |      |
|------|-----------------|---------|-----------------------------------------------|------|-------|------|------------|------|------------------|------|----------|------|--------------|------|-------|------|
|      |                 |         | Control CEP                                   | STDV | UROS  | STDV | UROS + CPX | STDV | Control MAT1A-KO | STDV | MAT1A-KO | STDV | Control CDHF | STDV | CDHF  | STDV |
| 16   | 2PG             | E1      | 0.44                                          | 0.06 | 0.38  | 0.06 | 0.43       | 0.08 | 0.28             | 0.00 | 0.24     | 0.02 | 0.17         | 0.01 | 0.54  | 0.03 |
| 14   | 3PG             | E1      | 0.56                                          | 0.10 | 1.37  | 0.04 | 0.39       | 0.08 | 0.62             | 0.01 | 0.78     | 0.04 | 0.51         | 0.03 | 0.96  | 0.06 |
| 2    | 6PG             | E1      | 0.13                                          | 0.02 | 0.03  | 0.01 | 0.06       | 0.01 | 0.40             | 0.02 | 0.17     | 0.02 | 0.26         | 0.02 | 0.23  | 0.01 |
| 30   | ADPR            | E1      | 0.54                                          | 0.07 | 0.97  | 0.11 | 0.46       | 0.05 | 1.12             | 0.04 | 1.55     | 0.13 | 0.39         | 0.05 | 1.81  | 0.19 |
| 9    | AMP/GMP         | E1      | 1.44                                          | 0.18 | 1.21  | 0.14 | 1.84       | 0.10 | 3.59             | 0.27 | 6.97     | 0.59 | 3.80         | 0.04 | 9.08  | 0.65 |
| 32   | CDPCH           | E1      | 0.15                                          | 0.02 | 0.31  | 0.04 | 0.14       | 0.01 | 0.39             | 0.02 | 0.17     | 0.02 | 0.27         | 0.00 | 0.04  | 0.01 |
| 29   | CDPE            | E1      | 1.14                                          | 0.12 | 0.93  | 0.18 | 0.86       | 0.08 | 3.53             | 0.08 | 1.57     | 0.35 | 1.48         | 0.07 | 1.36  | 0.12 |
|      | Cho             | E1 (1H) | 4.38                                          | 0.15 | 2.45  | 0.24 | 3.52       | 0.15 | 0.07             | 0.01 | 0.09     | 0.01 | 0.47         | 0.02 | 1.08  | 0.06 |
| 47   | CL              | E2      | 0.40                                          | 0.07 | 0.62  | 0.10 | 0.41       | 0.07 | 0.05             | 0.01 | 0.06     | 0.01 | 0.18         | 0.01 | 0.13  | 0.01 |
| 10   | CMP             | E1      | 1.06                                          | 0.14 | 0.80  | 0.10 | 1.33       | 0.08 | 1.26             | 0.10 | 1.58     | 0.16 | 1.46         | 0.07 | 1.17  | 0.07 |
| 15   | E4P             | E1      | 0.03                                          | 0.01 | 0.07  | 0.02 | 0.22       | 0.04 | 0.04             | 0.00 | 0.03     | 0.01 | 0.03         | 0.01 | 0.06  | 0.01 |
| 7    | F6P             | E1      | 0.02                                          | 0.01 | 0.10  | 0.04 | 0.32       | 0.05 | 0.04             | 0.01 | 0.11     | 0.02 | 0.05         | 0.00 | 0.16  | 0.02 |
| 28   | FADH2           | E1      | 0.78                                          | 0.13 | 0.37  | 0.03 | 1.17       | 0.24 | 2.74             | 0.39 | 0.60     | 0.21 | 1.76         | 0.36 | 0.80  | 0.16 |
| 5    | FBP             | E1      | 0.02                                          | 0.01 | 0.06  | 0.01 | 0.32       | 0.05 | 0.04             | 0.01 | 0.08     | 0.01 | 0.17         | 0.02 | 0.13  | 0.01 |
| 18   | G1P             | E1      | 0.94                                          | 0.09 | 0.49  | 0.04 | 0.88       | 0.07 | 0.46             | 0.02 | 0.66     | 0.03 | 0.71         | 0.06 | 0.83  | 0.07 |
| 3    | G6P             | E1      | 0.12                                          | 0.03 | 0.06  | 0.01 | 0.82       | 0.15 | 0.56             | 0.02 | 0.85     | 0.06 | 0.55         | 0.01 | 1.52  | 0.23 |
| 22   | GPC             | E1      | 5.58                                          | 1.03 | 3.22  | 0.49 | 2.29       | 0.76 | 2.74             | 0.12 | 0.79     | 0.09 | 1.53         | 0.15 | 2.16  | 0.18 |
| 21   | GPE             | E1      | 3.23                                          | 0.38 | 1.65  | 0.41 | 1.40       | 0.47 | 1.57             | 0.13 | 0.39     | 0.06 | 0.65         | 0.07 | 0.68  | 0.04 |
| 17   | Impurity        | E1      | 1.27                                          | 0.06 | 1.38  | 0.11 | 1.38       | 0.13 | 1.21             | 0.05 | 1.01     | 0.10 | 1.27         | 0.03 | 3.16  | 0.20 |
|      | LAC             | E1 (1H) | 3.30                                          | 0.15 | 4.45  | 0.16 | 2.36       | 0.16 | 2.73             | 0.22 | 2.41     | 0.43 | 4.57         | 0.08 | 8.53  | 0.63 |
| 40   | LPA/LPE         | E2      | 0.02                                          | 0.00 | 0.01  | 0.00 | 0.01       | 0.00 | 0.01             | 0.00 | 0.01     | 0.00 | 0.00         | 0.00 | 0.01  | 1.00 |
| 44   | LPC             | E2      | 0.07                                          | 0.01 | 0.12  | 0.01 | 0.06       | 0.01 | 0.00             | 0.00 | 0.01     | 0.00 | 0.00         | 0.00 | 0.02  | 0.00 |
| 31   | NADH            | E1      | 0.56                                          | 0.07 | 0.21  | 0.03 | 0.30       | 0.02 | 4.21             | 0.09 | 2.10     | 0.23 | 0.43         | 0.04 | 1.96  | 0.24 |
| 20   | NADPH           | E1      | 0.81                                          | 0.09 | 0.20  | 0.04 | 0.52       | 0.08 | 0.39             | 0.03 | 0.16     | 0.02 | 0.19         | 0.00 | 1.09  | 0.12 |
| 25   | NDPs            | E1      | 1.81                                          | 0.08 | 1.31  | 0.05 | 2.07       | 0.15 | 3.08             | 0.14 | 2.89     | 0.25 | 1.27         | 0.06 | 3.39  | 0.24 |
| 35   | NTPs            | E1      | 0.23                                          | 0.05 | 0.13  | 0.03 | 0.07       | 0.02 | 5.86             | 0.17 | 1.69     | 0.23 | 0.42         | 0.02 | 1.43  | 0.19 |
| 50   | PC              | E2      | 2.78                                          | 0.18 | 1.53  | 0.26 | 3.00       | 0.28 | 2.25             | 0.17 | 2.58     | 0.26 | 2.64         | 0.11 | 5.61  | 0.68 |
| 12   | PCH             | E1      | 0.15                                          | 0.01 | 0.11  | 0.01 | 0.67       | 0.10 | 0.53             | 0.11 | 0.43     | 0.06 | 0.95         | 0.07 | 0.17  | 0.01 |
| 24   | PCr             | E1      | 0.25                                          | 0.03 | 0.19  | 0.02 | 0.16       | 0.02 | 0.16             | 0.01 | 0.19     | 0.03 | 0.12         | 0.01 | 0.16  | 0.01 |
| 46   | PE              | E2      | 0.62                                          | 0.08 | 0.84  | 0.10 | 0.64       | 0.10 | 0.25             | 0.01 | 0.40     | 0.03 | 0.31         | 0.01 | 0.97  | 0.12 |
| 11   | PEA             | E1      | 0.13                                          | 0.02 | 0.11  | 0.01 | 0.54       | 0.09 | 0.67             | 0.11 | 0.27     | 0.05 | 0.89         | 0.04 | 0.37  | 0.03 |
| 23   | PEP             | E1      | 0.04                                          | 0.01 | 0.04  | 0.01 | 0.04       | 0.01 | 0.11             | 0.01 | 0.03     | 0.00 | 0.02         | 0.00 | 0.05  | 0.02 |
| 41   | PG              | E2      | 0.10                                          | 0.01 | 0.18  | 0.07 | 0.11       | 0.05 | 0.01             | 0.00 | 0.01     | 0.00 | 0.02         | 0.01 | 0.06  | 0.01 |
| 42   | PI              | E2      | 0.07                                          | 0.02 | 0.05  | 0.01 | 0.06       | 0.02 | 0.00             | 0.00 | 0.01     | 0.00 | 0.02         | 0.00 | 0.04  | 0.00 |
| 19   | PO <sub>4</sub> | E1      | 63.00                                         | 1.74 | 52.82 | 4.45 | 84.80      | 6.20 | 21.54            | 2.07 | 29.49    | 2.28 | 47.68        | 0.16 | 23.62 | 1.26 |
| 39   | PS              | E2      | 0.36                                          | 0.06 | 0.25  | 0.06 | 0.27       | 0.07 | 0.13             | 0.01 | 0.13     | 0.02 | 0.03         | 0.01 | 0.18  | 0.04 |
| 4    | S7P             | E1      | 0.35                                          | 0.04 | 0.28  | 0.09 | 1.44       | 0.20 | 3.71             | 0.14 | 3.28     | 0.24 | 4.38         | 0.06 | 0.69  | 0.04 |
| 43   | SM              | E2      | 0.07                                          | 0.01 | 0.05  | 0.01 | 0.10       | 0.04 | 0.00             | 0.00 | 0.01     | 0.00 | 0.05         | 0.01 | 0.02  | 0.00 |
|      | TC              | E2 (1H) | 3.23                                          | 0.03 | 4.25  | 0.05 | 2.85       | 0.11 | 3.28             | 0.08 | 3.91     | 0.47 | 3.17         | 0.22 | 8.23  | 0.98 |
|      | TG              | E2 (1H) | 23.14                                         | 1.31 | 29.88 | 1.89 | 18.98      | 1.96 | 9.10             | 0.38 | 12.02    | 0.40 | 12.62        | 0.18 | 38.89 | 4.31 |
| 8    | TMP             | E1      | 0.18                                          | 0.03 | 0.28  | 0.05 | 0.52       | 0.06 | 0.51             | 0.07 | 0.64     | 0.07 | 0.53         | 0.00 | 0.43  | 0.10 |
| 1    | TMP+            | E1      | 0.99                                          | 0.01 | 1.00  | 0.01 | 1.01       | 0.02 | 0.93             | 0.05 | 1.06     | 0.06 | 1.00         | 0.00 | 1.00  | 0.00 |
| 36   | TPP             | E2      | 3.79                                          | 0.06 | 4.46  | 0.32 | 4.00       | 0.06 | 3.54             | 0.15 | 3.84     | 0.04 | 3.87         | 0.02 | 4.00  | 0.00 |
| 27   | NDPG            | E1      | 0.32                                          | 0.05 | 0.87  | 0.10 | 0.33       | 0.07 | 1.73             | 0.08 | 2.09     | 0.24 | 0.36         | 0.06 | 1.87  | 0.10 |
| 26   | UDPGA / UDPgal  | E1      | 0.14                                          | 0.01 | 0.57  | 0.03 | 0.17       | 0.05 | 0.95             | 0.07 | 0.47     | 0.06 | 0.28         | 0.01 | 0.72  | 0.03 |
| 13   | UMP             | E1      | 0.07                                          | 0.01 | 0.06  | 0.01 | 0.42       | 0.09 | 0.59             | 0.08 | 0.39     | 0.05 | 0.87         | 0.05 | 0.14  | 0.01 |
| 6    | X5P             | E1      | 0.24                                          | 0.03 | 0.15  | 0.05 | 1.05       | 0.14 | 0.77             | 0.03 | 0.48     | 0.04 | 0.75         | 0.02 | 0.17  | 0.01 |
| 33   | Unknown         | E1      | 0.09                                          | 0.01 | 0.13  | 0.03 | 0.07       | 0.01 | 0.27             | 0.01 | 0.07     | 0.01 | 0.07         | 0.00 | 0.16  | 0.02 |
| 34   | Unknown         | E1      | 0.44                                          | 0.07 | 0.67  | 0.10 | 0.36       | 0.07 | 1.69             | 0.05 | 0.65     | 0.08 | 0.54         | 0.01 | 0.95  | 0.03 |
| 37   | Unknown         | E2      | 0.06                                          | 0.01 | 0.17  | 0.08 | 0.07       | 0.03 | 0.00             | 0.00 | 0.01     | 0.00 | 0.00         | 0.00 | 0.02  | 0.00 |
| 38   | Unknown         | E2      | 0.12                                          | 0.03 | 0.31  | 0.08 | 0.19       | 0.05 | 0.00             | 0.00 | 0.01     | 0.00 | 0.00         | 0.00 | 0.02  | 0.00 |
| 45   | Unknown         | E2      | 0.16                                          | 0.05 | 0.21  | 0.07 | 0.21       | 0.08 | 0.00             | 0.00 | 0.01     | 0.00 | 0.03         | 0.01 | 0.12  | 0.01 |
| 48   | Unknown         | E2      | 0.12                                          | 0.03 | 0.54  | 0.16 | 0.25       | 0.09 | 0.00             | 0.00 | 0.02     | 0.00 | 0.00         | 0.00 | 0.06  | 0.01 |
| 49   | Unknown         | E2      | 0.15                                          | 0.04 | 0.65  | 0.13 | 0.30       | 0.09 | 0.00             | 0.00 | 0.01     | 0.00 | 0.00         | 0.00 | 0.05  | 0.01 |

**Table S3. Quantification of the metabolites and standard deviations (STDV) for the different compounds and mouse models under consideration.** The following number of mice were used in each experiment: Control CEP, n=6; CEP, n=7; CEP+CPX, n=7; Control MAT1A-KO, n=6; MAT1A-KO, n=9; Control MAT1A-KO, n=6; CDHF, n=9.

| <b>E1 (Hydrophilic)</b>    | <b><sup>31</sup>P (ppm)</b> | <b>STDV</b>  |
|----------------------------|-----------------------------|--------------|
| TMP+ (REF)                 | 25.83                       | 0.01         |
| 6PG                        | 6.86                        | 0.36         |
| G6P                        | 6.79                        | 0.28         |
| S7P                        | 6.66                        | 0.25         |
| FBP                        | 6.65<br>6.39                | 0.25<br>0.21 |
| X5P                        | 6.51                        | 0.23         |
| F6P                        | 6.39                        | 0.22         |
| TMP                        | 6.22                        | 0.28         |
| AMP/GMP                    | 6.14                        | 0.26         |
| CMP                        | 6.13                        | 0.22         |
| PEA                        | 5.97                        | 0.24         |
| PCH                        | 5.96                        | 0.23         |
| UMP                        | 5.95                        | 0.22         |
| 3PG                        | 5.77                        | 0.24         |
| E4P                        | 5.60                        | 0.24         |
| 2PG                        | 5.40                        | 0.25         |
| G1P                        | 4.71                        | 0.37         |
| PO4                        | 4.45                        | 0.41         |
| NADPH                      | 3.90                        | 0.05         |
| GPE                        | 3.41                        | 0.01         |
| GPC                        | 2.87                        | 0.01         |
| PEP                        | -0.23                       | 0.06         |
| PCr                        | -1.62                       | 0.00         |
| NDPs/NTPs                  | -2.86                       | 0.29         |
|                            | -3.94                       | 0.49         |
|                            | -7.17                       | 0.27         |
|                            | -7.68                       | 0.04         |
| UDPGA / UDPgal             | -8.20                       | 0.05         |
|                            | -9.65                       | 0.02         |
| UDPG / ADPG / GDPG / FADH2 | -8.24                       | 0.01         |
|                            | -9.83                       | 0.01         |
| CDPE                       | -8.26                       | 0.02         |
| ADPR                       | -8.34                       | 0.11         |
| NADH                       | -8.61                       | 0.05         |
| CDPCH                      | -9.07                       | 0.09         |
| NTPs                       | -16.72                      | 0.37         |

  

| <b>E2 (Hydrophobic)</b> | <b><sup>31</sup>P (ppm)</b> | <b>STDV</b> |
|-------------------------|-----------------------------|-------------|
| TPP (REF)               | 28.60                       | 0.09        |
| PS                      | 4.05                        | 0.08        |
| LPA/LP                  | 4.02                        | 0.06        |
| PG                      | 3.99                        | 0.07        |
| PI                      | 3.84                        | 0.10        |
| SM                      | 3.80                        | 0.10        |
| LPC                     | 3.46                        | 0.04        |
| PE                      | 3.15                        | 0.07        |
| CL                      | 3.19                        | 0.10        |
| PC                      | 1.67                        | 0.09        |

**Table S4. <sup>31</sup>P Chemical shifts of assigned metabolites in the hydrophilic (E1) and hydrophobic phase (E2).**

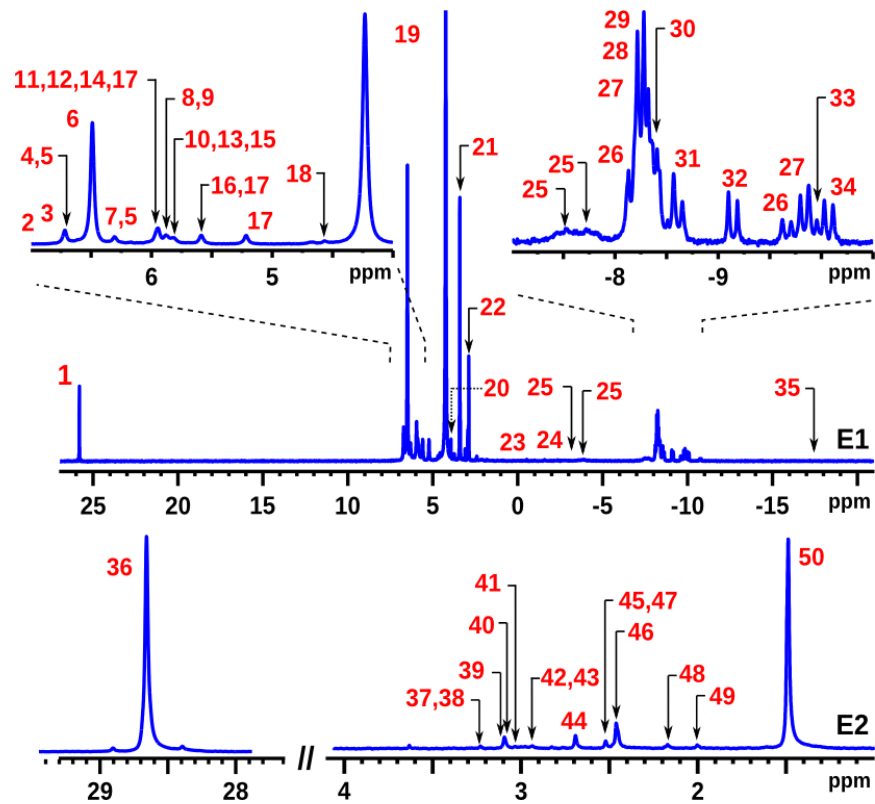

**Figure S6.**  $^{31}\text{P}$ -NMR spectrum of a sample of human liver tissue (hepatocellular carcinoma) obtained from biopsy. E1 (E2) stands for the hydrophilic (lipophilic) extract. A total of 50 different peaks are identified within the two extracts. For the abbreviation meaning, see Table 1.

| Mice           | Control CEP<br>(n = 6) | CEP (n = 6)      | CEP+CPX (n = 6)  |
|----------------|------------------------|------------------|------------------|
| NAS score      | 0 (100%)               | 2 (66%); 3 (33%) | 0 (100%)         |
| Fibrosis stage | 0 (100%)               | 1 (66%); 0 (33%) | 0 (66%); 1 (33%) |

**Table S5. NAS score for CEP.** Reference values for NAS scores: 0-2 considered as not diagnostic of NASH, 3-4 borderline diagnostic of NASH, 5-8 positive diagnostic of NASH.

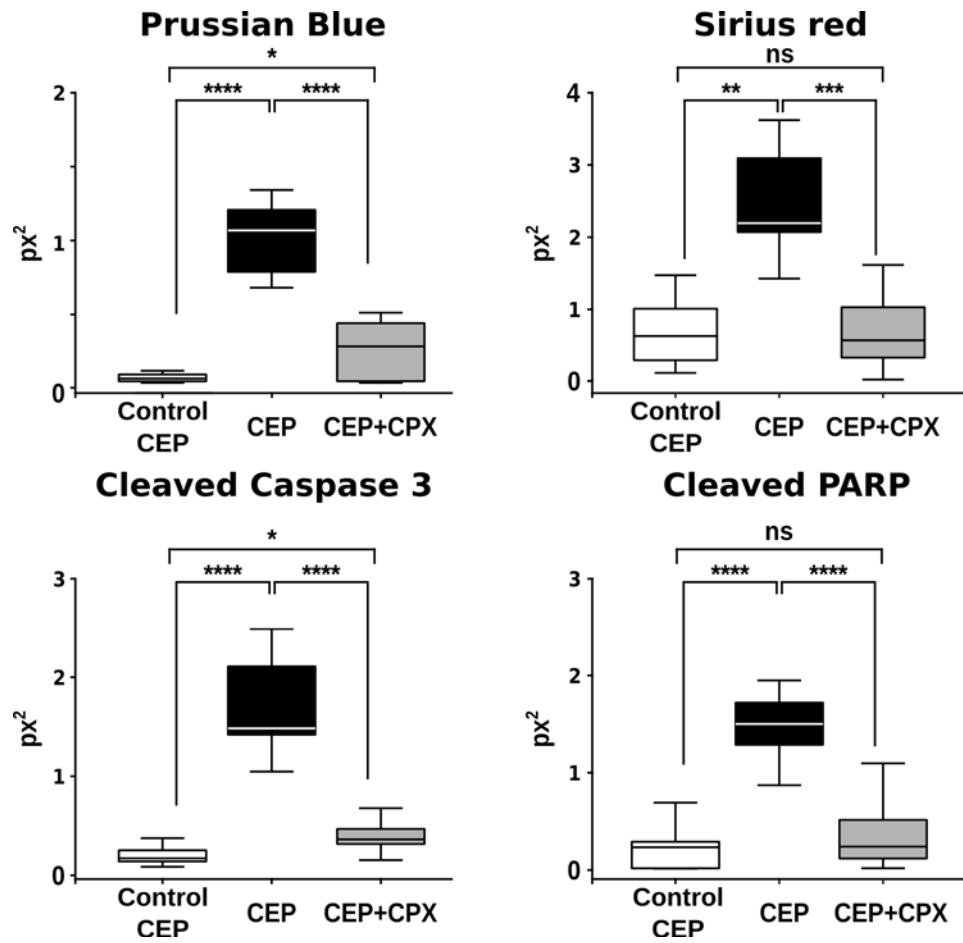

**Figure S7. Quantification of the different histological stainings.** P-values of < 0.1, 0.05, 0.01, 0.001 and 0.0001 are represented by ., \*, \*\*, \*\*\*, \*\*\*\* and \*\*\*\* respectively while ns accounts for not significant.

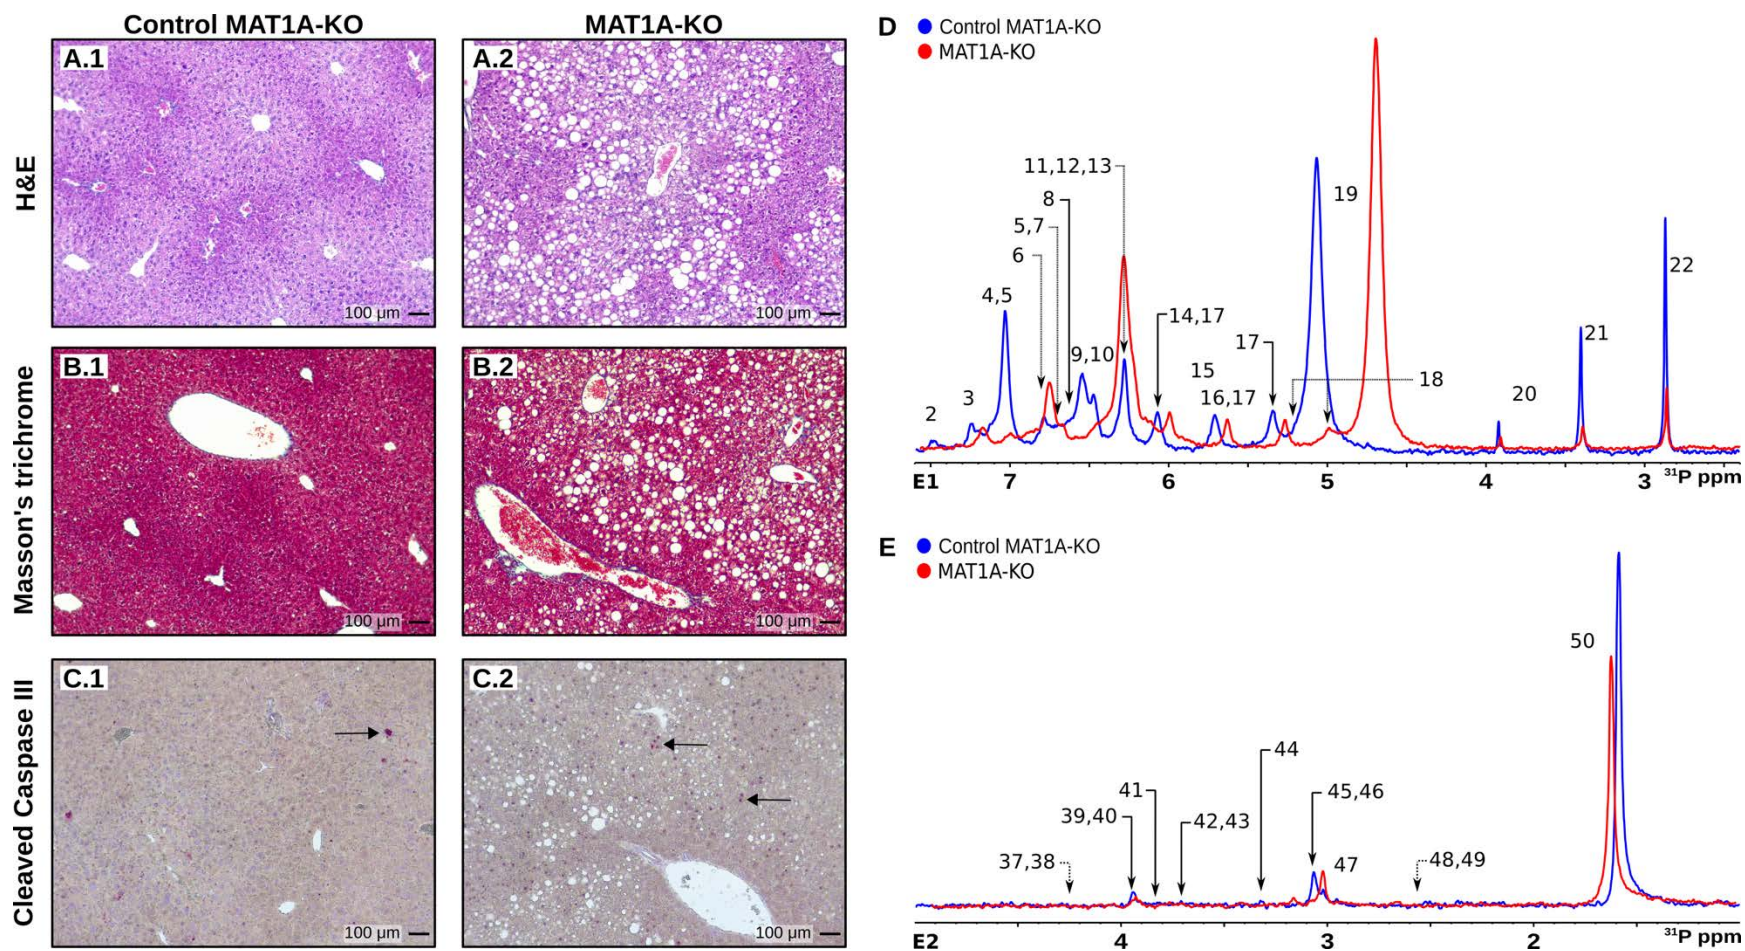

**Figure S8. Characterization of the MAT1A-KO mice.** A-C) Histology performed by Hematoxylin/Eosin (A.#) Masson's trichrome (B.#) and Cleaved Caspase III staining (C.#) of Control MAT1A-KO (#.1) and MAT1A-KO (#.2) mice models. MAT1A-KO mice is compatible with a steatotic liver with fibrosis. Arrows point to cells with Caspase III activity. D-E)  $^{31}\text{P}$ -NMR spectra of hydrophilic (D) and lipophilic (E) phase for WT (blue) and MAT1A-KO (red) mice models. For the abbreviation meaning, see Table 1.

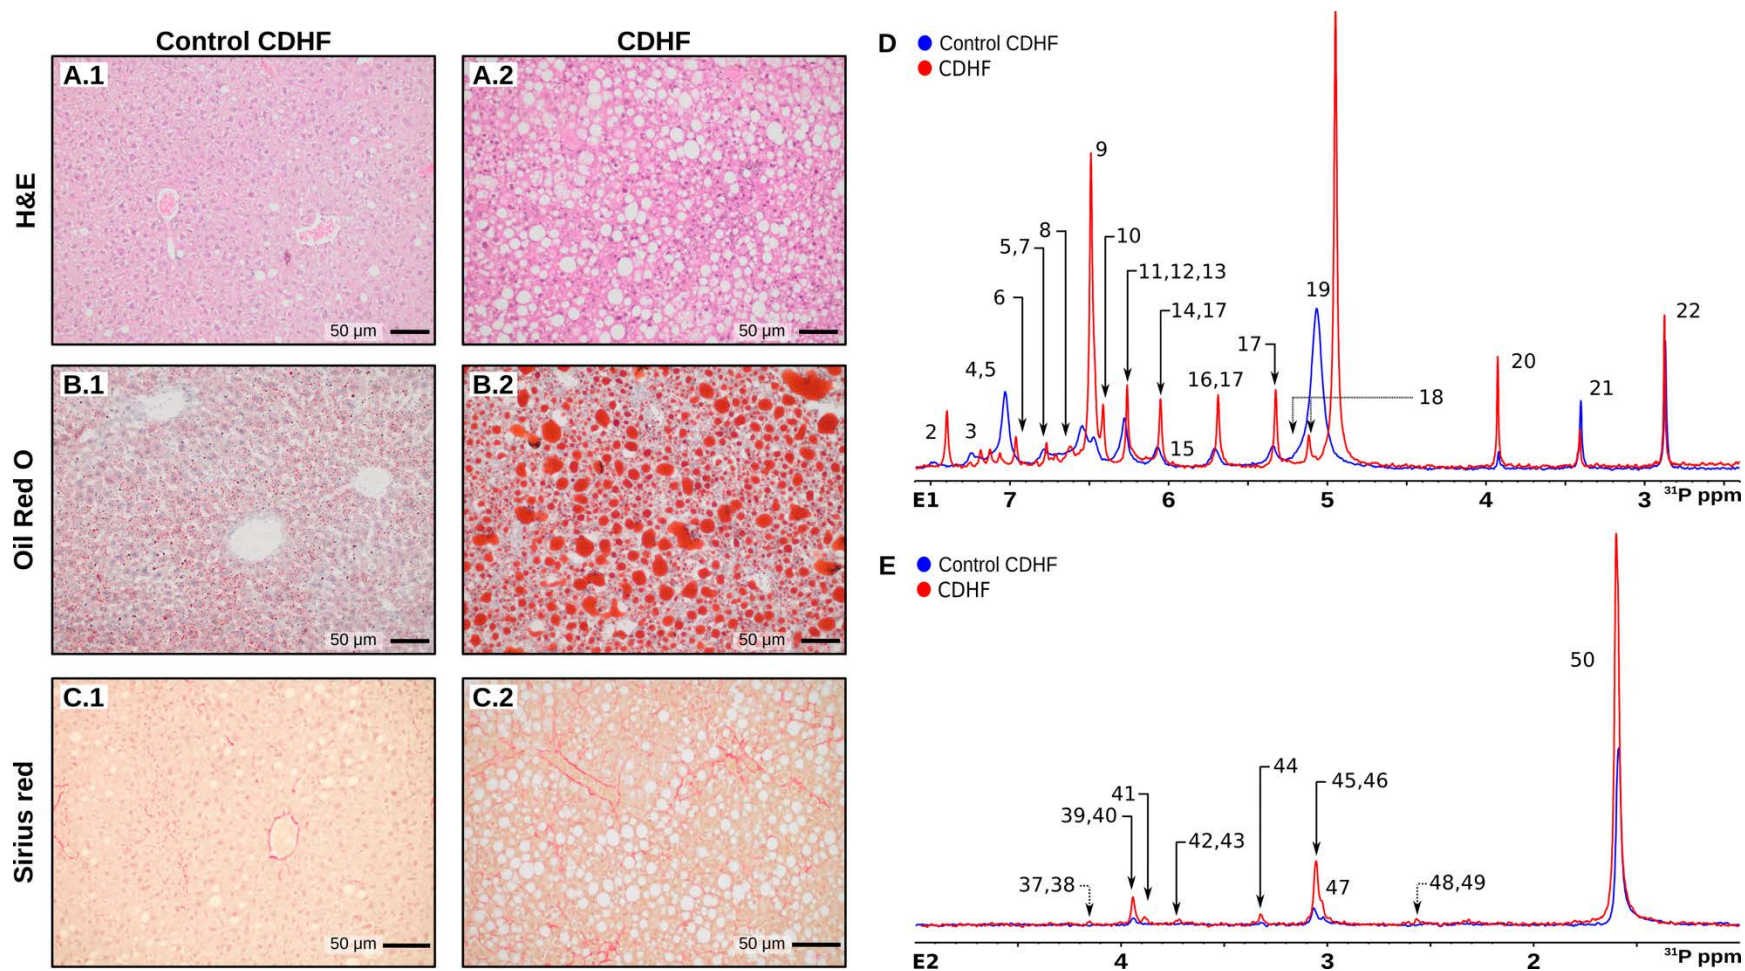

**Figure S9. Characterization of the CDHF mice.** A-C) Histology performed by Hematoxylin/Eosin (A.#), Oil Red-O (B.#) and Cleaved Caspase III staining (C.#) of Control CDHF (#.1) and CDHF (#.2) mice models. CDHF mice is compatible with a steatotic liver with fibrosis. Arrows point to cells with Caspase III activity. D-E)  $^{31}\text{P}$ -NMR spectra of hydrophilic (D) and lipophilic (E) phase for WT (blue) and CDHF (red) mice models. For the abbreviation meaning, see Table 1.
